# Supplementary material for: Concise asymmetric synthesis of (−)-sparteine
Source: Royal Society of Chemistry journal article supplement (doi:10.1039/b406632d), 2004-01-01
Supplement: b406632d.doc [file b406632d.doc]

Concise asymmetric synthesis of (–)-sparteine

Jean-Paul R. Hermet,a Matthew J. McGrath,a Peter O’Brien,*a David W. Porter and John Gildayb

a Department of Chemistry, University of York, Heslington, York YO10 5DD UK. Fax: +44 1904 432516; Tel: +44 1904 432535; E-mail: [paob1@york.ac.uk](mailto:paob1@york.ac.uk)

b AstraZeneca, Process R & D, Avlon Works, Severn Road, Hallen, Bristol BS10 7ZE, UK

**Supporting Information:**

Full experimental procedures/data for **7**, **8**, *ent*-**7**, *ent*-**8**, **9**, **10**, **2** and (–)-**1**

(*E*)-7-Iodohept-2-enoate **6** was prepared using three known steps from 5-chloropentanol: (i) Swern oxidation;1 (ii) Horner-Wadsorth-Emmons reaction with triethyl phosphonoacetate2 and (iii) Finkelstein reaction.3

**Ethyl {(2*S*)-1-[(1*R*)-1-phenylethyl]piperidin-2-yl}acetate** **7 and ethyl {(2*R*)-1-[(1*R*)-1-phenylethyl]piperidin-2-yl}acetate** **8**

(*R*)-**-Methylbenzylamine (0.74 cm3, 5.61 mmol) was added dropwise to a stirred solution of (*E*)-7-iodohept-2-enoate **6** (1.42 g, 5.05 mmol) and triethylamine (0.79 cm3, 5.61 mmol) in EtOH (14 cm3) at room temperature under nitrogen. The resulting solution was heated at reflux for 16 h. After cooling to room temperature, the solvent was evaporated under reduced pressure. Water (20 cm3) was added and the mixture was extracted with Et2O (2  30 cm3). The combined organic extracts were washed with water (30 cm3), 5% aqueous sodium thiosulfate solution (30 cm3) and brine (30 cm3), dried (MgSO4) and evaporated under reduced pressure to give the crude product which contained a 65:35 mixture (by 1H NMR spectroscopy) of amino esters **7** and **8**. Purification by flash column chromatography on silica with petrol-EtOAc-Et3N (90:10:) as eluent gave amino ester **7** (623 mg, 45 %) as a pale yellow oil, *R*F(9:1 Petrol-EtOAc) 0.30; []D +33.4 (*c* 1.1 in CHCl3); **max(CHCl3)/cm-1 1730 (C=O); **H(400 MHz; CDCl3) 7.37 (2 H, d, *J* 7.5, Ph), 7.29 (2 H, t, *J* 7.5, Ph), 7.21 (1 H, t, *J* 7.5, Ph), 4.23-4.08 (2 H, m, OC*H*2Me), 3.69 (1 H, q, *J* 6.5, PhC*H*Me), 3.55-3.46 (1 H, m, CHN), 2.62-2.49 (2 H, m, C*H*2CO2), 2.31 (1 H, td, *J* 4.5 and 12.0, C*H*AHBN), 2.20 (1 H, ddd, *J* 4.0, 9.0 and 12.0, CHA*H*BN), 1.86-1.19 (6 H, m), 1.86-1.71 (1 H, m), 1.65-1.25 (5 H, m), 1.30 (3 H, d, *J* 6.5, PhCH*Me*) and 1.26 (3 H, t, *J* 7.0, OCH2*Me*); **C(67.9 MHz; CDCl3) 173.2 (C=O), 128.1 (Ph), 127.3 (Ph), 126.5 (Ph), 60.3 (O*C*H2Me), 59.3 (Ph*C*HMe), 52.4 (CHN), 45.0 (CH2N), 32.1 (*C*H2CO2), 30.0 (CH2), 25.7 (CH2), 20.8 (PhCH*Me*), 17.8 (CH2) and 14.2 (OCH2*Me*); *m/z* (CI, NH3) 276 [100%, (M + H)+], 188 (80), 172 (40) and 105 (50)[Found: (M + H)+, 276.1967. C17H25NO2 requires *M* + H, 276.1964] and amino ester **8** (335 mg, 24%) as a pale yellow oil, *R*F(9:1 Petrol-EtOAc) 0.15; []D +8.2 (*c* 1.0 in CHCl3)(lit.,4 []D –8.1 (*c* 1.3 in CHCl3) for *ent*-**8**); identical (by 1H and 13C NMR spectroscopy) to that reported in the literature.4

**Ethyl {(2*R*)-1-[(1*S*)-1-phenylethyl]piperidin-2-yl}acetate** ***ent-*7 and ethyl {(2*S*)-1-[(1*S*)-1-phenylethyl]piperidin-2-yl}acetate** ***ent-*8**

Using the above procedure, (*S*)-**-methylbenzylamine (0.73 cm3, 5.57 mmol), (*E*)-7-iodohept-2-enoate **6** (1.42 g, 5.02 mmol) and triethylamine (0.79 cm3, 5.57 mmol) in EtOH (14 cm3) gave the crude product which contained a 65:35 mixture (by 1H NMR spectroscopy) of amino esters *ent-***7** and *ent*-**8**. Purification by flash column chromatography on silica with petrol-EtOAc-Et3N (90:10:) as eluent gave amino ester *ent*-**7** (638 mg, 46 %) as a pale yellow oil, []D –35.9 (*c* 1.3 in CHCl3) and amino ester *ent*-**8** (259 mg, 19%) as a pale yellow oil, []D –9.4 (*c* 1.0 in CHCl3)(lit.,4 []D –8.1 (*c* 1.3 in CHCl3)).

**Ethyl (2*R*)-3-ethoxy-2-{(2*S*)-1-[(1*R*)-1-phenylethyl]piperidin-2-yl}propionate 9**

LHMDS (3.1 cm3 of a 1.06 M solution in THF, 3.27 mmol) was added dropwise to a stirred solution of amino ester **7** (600 mg, 2.18 mmol) in THF (13 cm3) at –78 °C under nitrogen. The resulting solution was stirred at –78 °C for 1 h. Then, choromethylethyl ether (0.32 cm3, 3.27 mmol) was added dropwise. The resulting solution was allowed to warm to room temperature over 4 h and stirred at room temperature for 12 h. Then, the solvent was evaporated under reduced pressure. The residue was partitioned between water (20 cm3) and Et2O-CH2Cl2 (1:1) (20 cm3). The layers were separated and the aqueous layer was extracted with Et2O-CH2Cl2 (1:1) (3  20 cm3). The combined organic extracts were dried (MgSO4) and evaporated under reduced pressure to give the crude product as a single diastereomer by 1H NMR spectroscopy. Purification by flash column chromatography on silica with petrol-EtOAc-Et3N (90:9:1) as eluent gave alkylated adduct **9** (685 mg, 94 %) as a colourless oil, *R*F(9:1 Petrol-EtOAc) 0.30; []D +14.6 (*c* 1.0 in CHCl3); **max(CHCl3)/cm-1 1730 (C=O); **H(400 MHz; CDCl3) 7.37 (2 H, d, *J* 7.5, Ph), 7.31 (2 H, t, *J* 7.5, Ph), 7.22 (1 H, t, *J* 7.5, Ph), 4.31-4.08 (3 H, m, PhC*H*Me and OC*H*2Me), 3.70 (1 H, t, *J* 9.5, CHC*H*AHBO), 3.64 (1 H, dd, *J* 3.5 and 9.5, CHCHA*H*BO), 3.46 (2 H, q, *J* 7.0, OC*H*2Me), 3.27 (1 H, ddd, *J* 3.5, 7.0 and 9.5, CHCO2), 2.85 (1 H, dt, *J* 3.0 and 7.0, CHN), 2.70 (1H, ddd, *J* 3.5, 7.0 and 13.0, C*H*AHBN), 2.41 (1 H, ddd, *J* 3.0, 8.0 and 13.0, CHA*H*BN), 1.86-1.17 (6 H, m), 1.31 (3 H, d, *J* 6.5, PhCH*Me*), 1.27 (3 H, t, *J* 7.0, CH2*Me*) and 1.13 (3 H, t, *J* 7.0, CH2*Me*); **C(100.6 MHz, CDCl3) 173.6 (C=O), 144.8 (*ipso*-Ph), 127.9 (Ph), 127.6 (Ph), 126.4 (Ph), 67.7 (OCH2), 66.6 (OCH2), 60.3 (OCH2Me), 56.9 (Ph*C*HMe), 55.7 (CHN), 47.3 (CH), 44.0 (CH2N), 25.6 (CH2), 23.7 (CH2), 23.0 (CH2), 15.0 (Me), 14.2 (Me) and 13.6 (Me); *m/z* (CI, NH3) 334 [100%, (M + H)+] and 188 (52)[Found: (M + H)+, 334.2381. C20H31NO3 requires *M* + H, 334.2382].

**Ethyl 2-{(2*S*)-1-[(1*R*)-1-phenylethyl]piperidin-2-yl}acrylate 10**

Potassium *tert*-butoxide (2.5 cm3 of a 1.0 M solution in THF, 2.46 mmol) was added over 45 min to a stirred solution of alkylated adduct **9** (685 mg, 2.05 mmol) in THF (2.5 cm3) at –78 C under nitrogen. The resulting mixture was stirred at this temperature for 8.5 h. Then, saturated aqueous ammonium chloride (1 cm3) was added and the solution was allowed to warm to room temperature over 16 h. The layers were separated and the aqueous layer was extracted with Et2O (5 cm3). The combined organic extracts were dried (MgSO4) and evaporated under reduced pressure to give the crude product. Purification by flash column chromatography on silica with petrol-EtOAc-Et3N (90:10:1) as eluent gave Michael acceptor **10** (382 mg, 65%) as a colourless oil, *R*F(9:1 Petrol-EtOAc) 0.40; []D –25.7 (*c* 1.0 in CHCl3); **max(CHCl3)/cm-1 1705 (C=O); **H(400 MHz; CDCl3) 7.44 (2 H, d, *J* 7.5, Ph), 7.28 (2 H, t, *J* 7.5, Ph), 7.19 (1 H, t, *J* 7.5, Ph), 6.34 (1 H, d, *J* 1.5, C*H*AHB=C), 6.05 (1 H, d, *J* 1.5, CHA*H*B=C), 4.28-4.19 (2 H, m, OC*H*2Me), 4.15 (1 H, q, *J* 7.0, PhC*H*Me), 3.61 (1 H, dd, *J* 2.5 and 10.5, CHN), 2.51 (1 H, br d, *J* 11.5, C*H*AHBN), 2.18 (1 H, dt, *J* 2.5 and 11.5, CHA*H*BN), 1.88-1.79 (1 H, m), 1.78-1.66 (1 H, m), 1.58-1.18 (4 H, m), 1.31 (3 H, t, *J* 7.0, OCH2*Me*) and 1.25 (3 H, d, *J* 7.0, PhCH*Me*); **C(100.6 MHz, CDCl3) 167.1 (C=O), 144.7 (*ipso*-Ph), 144.0 (C=*C*CO2), 127.8 (Ph), 127.4 (Ph), 126.1 (Ph), 126.0 (*C*H2=C), 60.7 (O*C*H2Me), 59.3 (Ph*C*HMe), 54.8 (CHN), 45.1 (CH2), 35.7 (CH2), 26.1 (CH2), 25.2 (CH2), 14.2 (Me) and 9.1 (Me); *m/z* (CI, NH3) 288 [100%, (M + H)+] [Found: (M + H)+, 288.1964. C18H25NO2 requires *M* + H, 288.1964].

Dodecahydro-7,14-methano-dipyrido[1,2-a',2'-e][1,5]diazocine-6,13-dione (+)-2

*n*-Butyllithium (0.61 cm3 of a 1.38 M solution in hexanes, 0.84 mmol) was added dropwise over 10 min to a stirred solution of diisopropylamine (117 L, 0.84 mmol) in THF (0.5 cm3) at –78 C under nitrogen. The resulting solution was warmed to 0 C and held at that temperature for 5 min, then cooled to –78 C. An ice-cooled solution of amino ester *ent*-**7** (219 mg, 0.80 mmol) in THF (2.0 cm3) was added dropwise over 5 min *via* cannula (the flask was rinsed with THF (1 cm3) to ensure quantitative transfer). The resulting solution was stirred at –78 C for 20 min, warmed to 0 C and held at that temperature for 5 min, then cooled to –78 C and stirred at that temperature for 30 min. An ice-cooled solution of Michael acceptor **10** (229 mg, 0.80 mmol) in THF (2.0 cm3) was added dropwise over 5 min *via* cannula (the flask was rinsed with THF (1 cm3) to ensure quantitative transfer). The solution was allowed to warm to –30 C over 5.5 h, and stirred at that temperature for 3 h. Then, the solution was added dropwise to a stirred ice-cold solution of Et2O (5 cm3) and 1 M aqueous hydrochloric acid (1 cm3) *via* cannula. The layers were separated and the aqueous layer was extracted with Et2O (2  10 cm3). The combined organic extracts were dried (MgSO4) and evaporated under reduced pressure to give the crude product. Purification by flash column chromatography on silica with petrol-EtOAc-Et3N (93.2:6.6:0.1) as eluent gave Michael acceptor **10** (37 mg, 16% recovery) and a 60:40 mixture (by 1H NMR spectroscopy) of adduct **3** and amino ester *ent*-**7** (268 mg) as a colourless oil, *R*F(93.2:6.6:0.1 Petrol-EtOAc-Et3N) 0.25; **H(400 MHz; CDCl3) for **3**: 7.47-7.12 (10 H, m), 4.29-4.20 (2 H, m), 4.20-4.10 (1 H, m), 4.07-3.97 (2 H, m), 3.79-3.71 (1 H, m), 2.96 (1 H, ddd, *J* 3.0, 8.0 and 11.5), 2.89-2.80 (2 H, m), 2.74-2.66 (3 H, m), 2.62-2.49 (1 H, m), 2.35-2.15 (2 H, m), 1.89-1.33 (13 H, m), 1.33-1.12 (9 H, m) and 0.96 (3 H, t, *J* 7.0, OCH2Me).

Palladium(II) hydroxide (20%) on carbon (70 mg, 0.07 mmol) was added in one portion to a stirred solution of the 60:40 mixture of adduct **3** and amino ester *ent*-**7** (268 mg) and ammonium formate (200 mg, 3.17 mmol) in refluxing EtOH (3 cm3) under nitrogen. After stirring at reflux for 14 h, the mixture was allowed to cool to room temperature and the solids were removed by filtration through Celite and washed with CH2Cl2 (20 cm3). 2 M Aqueous ammonium hydroxide solution (9 cm3) was added, the layers were separated and the aqueous layer was extracted with CH2Cl2 (3  10 cm3). The combined organic extracts were washed with water (5 cm3), dried (Na2SO4), and evaporated under reduced pressure to give the crude product as an off-white solid. Ice-cold Et2O (5 cm3) was added and the resulting suspension was left at 0 C for 15 min. Then, the solids were collected by filtration, washed with ice-cold Et2O (2 cm3) and dried under vacuum to give bislactam **2** (75 mg, 36% over two steps) as a white solid, mp 60-65 °C; []D +72.3 (*c* 1.0 in CHCl3); **max(CHCl3)/cm-1 1628 (C=O); **H(400 MHz; CDCl3) 4.79-4.68 (2 H, m), 3.55 (1 H, br d, *J* 13.5, C*H*AHBN), 3.36 (1 H, ddd, *J* 2.5, 5.0 and 12.0, C*H*AHBN), 2.64-2.58 (1 H, m), 2.61 (1 H, br d, *J* 2.0), 2.54-2.39 (1 H, m), 2.43 (1 H, dd, *J* 3.0 and 13.0), 2.22 (1 H, ddd, *J* 2.0, 4.0 and 13.0), 2.02-1.80 (4 H, m) and 1.77-1.14 (9 H, m); **C(100.6 MHz, CDCl3) 170.2 (C=O), 166.3 (C=O), 59.9 (CHN), 59.1 (CHN), 43.3 (CH2N), 42.7 (*C*HCO), 41.2 (CH2N), 41.9 (*C*HCO), 32.5 (CH2), 31.2 (CH2), 25.1 (CH2), 24.9 (CH2), 24.8 (CH2), 24.1 (CH2) and 21.8 (CH2); *m/z* (CI, NH3) 263 [100%, (M + H)+] [Found: (M + H)+, 263.1760. C15H22N2O2 requires *M* + H, 263.1747].

**(–)-Sparteine 1**

Lithium aluminium hydride (77 mg, 1.97 mmol) was added in one portion to a stirred solution of bislactam **2** (75 mg, 0.28 mmol) in THF (1.5 cm3) at 0 C under nitrogen. The resulting suspension was heated at reflux for 16 h. After cooling to room temperature, the suspension was diluted with Et2O (5 cm3) and excess solid hydrated sodium sulfate was added portionwise (CARE) until effervescence ceased. The suspension was stirred for 30 min at room temperature during which it became pale grey. The solids were removed by filtration through Celite and the filter cake was washed with CH2Cl2-MeOH (9:1) (15 cm3). The filtrate was dried (NaSO4) and evaporated under reduced pressure to give the crude product. Purification by Kugelrohr distillation gave (-)-sparteine **1** (59 mg, 88%) as a colourless oil, bp 120-125 °C/0.8 mm Hg (lit.,5 120-126 °C/1.25 mmHg); []D –18.1 (*c* 1.3 in EtOH)([]D –18.0 (*c* 1.3 in EtOH) recorded for an authentic commercial sample on the same instrument); **H(400 MHz; CDCl3) 2.72 (1 H, d, *J* 12.0), 2.69-2.55 (2 H, m), 2.48 (1 H, d, *J* 11.0), 2.28 (1 H, dd, *J* 3.5 and 11.5), 2.09-1.84 (5 H, m), 1.82-1.75 (1 H, m), 1.71-1.60 (3 H, m), 1.57-1.05 (11 H, m) and 0.99 (1 H, td, *J* 2.5 and 12.0); **C(100.6 MHz, CDCl3) 66.5 (CH), 64.4 (CH), 61.9 (CH2), 56.2 (CH2), 55.4 (CH2), 53.6 (CH2), 36.1 (CH), 34.6 (CH2), 33.0 (CH), 29.3 (CH2), 27.6 (CH2), 25.9 (CH2), 25.8 (CH2), 24.8 (CH2) and 24.7 (CH2). Spectroscopic data identical to an authentic commercial sample of (–)-sparteine.

**References for supporting information:**

1 R. W. Hoffmann, T. Sander and A. Hense, *Liebigs Ann. Chem.*, 1993, 771.

2 M. P. Cooke and R. K. Widener, *J. Org. Chem.*, 1989, **52**, 1381.

3 R. A. Bunce, C. J. Peeples and P. B. Jones, *J. Org. Chem.*, 1992, **57**, 1727.

4 P. O’Brien, D. W. Porter and N. M. Smith, *Synlett*, 2000, 1336.

5 N. J. Leonard and R. E. Beyler, *J. Am. Chem. Soc.*, 1950, **72**, 1316.
